# Supplementary material
Source: PubMed Central journal article supplement (PMC8312026)
Supplement: NIHMS1722453-supplement-SI_Guide__1_.pdf [file NIHMS1722453-supplement-SI_Guide__1_.pdf]

## Supplementary Figures and Legends 1-7 (PDF).

The supplementary figures show a phylogenetic tree analysis and protein surface conservation between *H. pylori* and ferritins from other species; biochemical characterization of HA-nanoparticles; antigenic characterization of HA-nanoparticles; the effect of preexisting anti-ferritin immunity on subsequent immunization using HA-nanoparticles; iron incorporation by *H. pylori* ferritin and HA-nanoparticles; development of a trivalent vaccine comprising three independent HA-nanoparticles (H1, H3 and influenza B); and biochemical characterization of  $\Delta$ RBS HA proteins.
